# Supplementary material for: Changes in contractile protein expression are linked to ventricular stiffness in infants with pulmonary hypertension or right ventricular hypertrophy due to congenital heart disease
Source: PubMed Central journal article supplement — Open Heart. 2018 Jan 3;5(1):e000716. doi: 10.1136/openhrt-2017-000716 (PMC5761287; doi:10.1136/openhrt-2017-000716), 2018-01-03
Supplement: openhrt-2017-000716supp001.pdf [file openhrt-2017-000716supp001.pdf]

## REFERENCES

Additional references added as on line.

1. Thomas PD, Campbell MJ, Kejariwal A, Mi H, Karlak B, Daverman R, et al. PANTHER: a library of protein families and subfamilies indexed by function. *Genome Res.* 2003;13(9):2129-41.
2. Mi H, Dong Q, Muruganujan A, Gaudet P, Lewis S, Thomas PD. PANTHER version 7: improved phylogenetic trees, orthologs and collaboration with the Gene Ontology Consortium. *Nucleic Acids Res.* 2010;38(Database issue):D204-10.
3. Ashburner M, Ball CA, Blake JA, Botstein D, Butler H, Cherry JM, et al. Gene ontology: tool for the unification of biology. The Gene Ontology Consortium. *Nat Genet.* 2000;25(1):25-9.
4. Eden E, Navon R, Steinfeld I, Lipson D, Yakhini Z. GOrilla: a tool for discovery and visualization of enriched GO terms in ranked gene lists. *BMC Bioinformatics.* 2009;10:48.
5. Hojlund K, Bowen BP, Hwang H, Flynn CR, Madireddy L, Geetha T, et al. In vivo phosphoproteome of human skeletal muscle revealed by phosphopeptide enrichment and HPLC-ESI-MS/MS. *Journal of proteome research.* 2009;8(11):4954-65.

*Appendix as on line section*

*Proteomics*

*Proteins were extracted in radio-immuno-precipitation assay (RIPA) buffer (1% NP-40, 0.5% sodium de-oxycholate, 0.1% SDS, in PBS) containing phosphatase and protease inhibitors, and quantified using the Bradford Quick Start Protein assay following manufacturer's instructions (Bio-Rad Laboratories, USA). Aliquots of 100µg of ten samples per experiment were digested with trypsin (2.5µg trypsin per 100µg protein; 37°C, overnight), labelled with Tandem Mass Tag (TMT) ten plex reagents according to the manufacturer's protocol (Thermo Fisher Scientific, UK) and the labelled samples pooled.*

*For the Total proteome analysis, aliquots of 50ug of the pooled sample were evaporated to dryness and re-suspended in buffer A (20 mM ammonium hydroxide, pH 10) prior to fractionation by high pH reversed-phase (RP) chromatography using an Ultimate 3000 liquid chromatography system (Thermo Fisher Scientific). The sample was loaded onto an XBridge BEH C18 Column (130Å, 3.5 µm, 2.1 mm X 150 mm, Waters, UK) in buffer A and peptides eluted with an increasing gradient of buffer B (20 mM Ammonium Hydroxide in acetonitrile, pH 10) from 0-95% over 60 minutes. The resulting fractions were evaporated to dryness and re-suspended in 1% formic*

36 acid prior to analysis by nano-LC MSMS using an Orbitrap Fusion Tribrid mass spectrometer  
37 (Thermo Scientific).

38 For the Phospho-proteome analysis, the remainder of the TMT-labelled pooled sample was  
39 evaporated to dryness and subjected to titanium oxide-based phosphopeptide enrichment  
40 according to the manufacturer's instructions (Pierce). The phospho-enriched sample was  
41 evaporated to dryness and then re-suspended in 1% formic acid prior to analysis by nano-LC  
42 MSMS using an Orbitrap Fusion Tribrid mass spectrometer (Thermo Scientific).

43

#### 44 Nano-LC Mass Spectrometry

45 High pH RP fractions (Total proteome analysis) or the phospho-enriched fraction (Phospho-  
46 proteome analysis) were further fractionated using an Ultimate 3000 nano-HPLC system in line  
47 with an Orbitrap Fusion Tribrid mass spectrometer (Thermo Scientific). In brief, peptides in 1%  
48 (vol/vol) formic acid were injected onto an Acclaim PepMap C18 nano-trap column (Thermo  
49 Scientific). After washing with 0.5% (vol/vol) acetonitrile 0.1% (vol/vol) formic acid peptides were  
50 resolved on a 250 mm × 75 µm Acclaim PepMap C18 reverse phase analytical column (Thermo  
51 Scientific) over a 150 min organic gradient, using 7 gradient segments (1-6% solvent B over  
52 1min, 6-15% B over 58min, 15-32%B over 58min, 32-40%B over 5min, 40-90%B over 1min, held  
53 at 90%B for 6min and then reduced to 1%B over 1min) with a flow rate of 300 nl min<sup>-1</sup>. Solvent  
54 A was 0.1% formic acid and Solvent B was aqueous 80% acetonitrile in 0.1% formic acid.  
55 Peptides were ionized by nano-electrospray ionization at 2.0kV using a stainless steel emitter  
56 with an internal diameter of 30 µm (Thermo Scientific) and a capillary temperature of 275°C.

57

58 All spectra were acquired using an Orbitrap Fusion Tribrid mass spectrometer controlled by  
59 Xcalibur 2.0 software (Thermo Scientific) and operated in data-dependent acquisition mode  
60 using an SPS-MS3 workflow. FTMS1 spectra were collected at a resolution of 120,000, with an

61 *automatic gain control (AGC) target of 200,000 and a maximum injection time of 50ms. The Top*  
62 *N most intense ions were selected for MS/MS. Precursors were filtered according to charge*  
63 *state (to include charge states 2-7) and with mono-isotopic precursor selection. Previously*  
64 *interrogated precursors were excluded using a dynamic window (40s +/-10ppm). The MS2*  
65 *precursors were isolated with a quadrupole mass filter set to a width of 1.2m/z. ITMS2 spectra*  
66 *were collected with an AGC target of 5,000, max injection time of 120ms and CID collision energy*  
67 *of 35%.*

68 *For FTMS3 analysis, the Orbitrap was operated at 60,000 resolution with an AGC target of*  
69 *50,000 and a max injection time of 120ms. Precursors were fragmented by high-energy collision*  
70 *dissociation (HCD) at normalised collision energy of 55% to ensure maximal TMT reporter ion*  
71 *yield. Synchronous Precursor Selection (SPS) was enabled to include up to 5 MS2 fragment*  
72 *ions in the FTMS3 scan.*

73

#### 74 *Data Analysis*

75 *The raw data files were processed and quantified using Proteome Discoverer software v1.4*  
76 *(Thermo Scientific) and peptide sequences searched against the Uniprot Human database*  
77 *(134169 sequences) using the SEQUEST algorithm. Peptide precursor mass tolerance was set*  
78 *at 10ppm, and MS/MS tolerance was set at 0.6Da. Search criteria included oxidation of*  
79 *methionine (+15.9949) as a variable modification and carbamido-methylation of cysteine*  
80 *(+57.0214) and the addition of the TMT mass tag (+229.163) to peptide N-termini and lysine as*  
81 *fixed modifications. For the Phospho analysis, phosphorylation of serine, threonine and tyrosine*  
82 *(+79.966) were also included as variable modifications. Searches were performed with full tryptic*  
83 *digestion and a maximum of 1 missed cleavage was allowed. The reverse database search*  
84 *option was enabled and all peptide data was filtered to satisfy false discovery rate (FDR) of 5%.*  
85 *Only proteins that were detected in all samples were used in any analysis (accession numbers*

86 *representing cDNA were excluded). Values for each of the proteins identified are presented as*  
87 *a ratio to the internal standard (a pool of all samples), and represent the median of the measured*  
88 *peptide(s) for each protein.*

89 *High-fold differences (fold decrease/increase greater than 1.3) were determined and a log-2*  
90 *transformation applied. Significance between groups was determined by an unpaired t-test (VSD*  
91 *compared with TOF), and  $-\log_{10}$  transformation applied. Only significant fold-changes ( $p < 0.05$ )*  
92 *were deemed of importance.*

93 *Gene name, derived by mapping protein accession numbers within the Uniprot database from*  
94 *'UniprotKB AC/ID' to 'Gene name', shall frequently be used synonymously with protein name*  
95 *throughout this paper (see Table 6).*

96 *Accession numbers were inputted to the Panther classification system (Database Version 11.1*  
97 *(released 2016-10-24) (1, 2) to obtain functional classification information (molecular function -*  
98 *molecular activities; cell component - where gene products are active; biological process -*  
99 *pathways and larger processes made up of the activities of multiple gene products (3).*

100 *Significantly altered protein accession numbers between pathologies were inputted into the*  
101 *'Gene Ontology enRlchment anaLysis and visuaLizAtion' tool (GORilla, Database update v.Feb*  
102 *4 2017, (4)) to determine enriched gene ontology (GO) terms, versus a background list*  
103 *comprised of all proteins detected during the proteomics and phosphoproteomics analysis. A p-*  
104 *value threshold of 0.001 was set. Proteins were searched against those published in literature*  
105 *(5) and using gene ontology terms to determine any structural, or extracellular matrix proteins.*

106
